# Supplementary material for: Bioconversion of Cheese Whey and Food By-Products by Phaeodactylum tricornutum into Fucoxanthin and n-3 Lc-PUFA through a Biorefinery Approach
Source: MDPI journal article supplement (doi:10.3390/md21030190), 2023-03-19
Supplement: s1 [file s1]

**Table S1.** Parameters for The MRM transitions

| Compound | Name              | Parent | Cone voltage (V) | Daughters                      | Collision energy (V) |
|----------|-------------------|--------|------------------|--------------------------------|----------------------|
| 1        | Fucoxanthin       | 641.41 | 4                | 109.03; 149.08; 119.05; 105.00 | 16; 18; 46; 48       |
| 2        | Violaxanthin      | 601.47 | 52               | 221.11; 105.06; 119.04; 583.47 | 14; 46; 42; 4        |
| 3        | Neoxanthin        | 600.58 | 12               | 105.06; 159.55; 142.58; 119.04 | 40; 30; 38; 34       |
| 4        | Astaxanthin       | 597.48 | 10               | 147.07; 119.05; 173.08; 107.02 | 12; 46; 12; 36       |
| 5        | Antheraxanthin    | 584.56 | 10               | 105.01; 119.05; 156.64; 145.06 | 44; 32; 32; 32       |
| 6        | Meso-zeaxanthin   | 568.8  | 14               | 476.41; 104.45; 118.59; 144.68 | 8; 56; 34; 26        |
| 7        | Zeaxanthin        | 568.52 | 10               | 476.38; 119.04; 105.00; 91.02  | 8; 34; 56; 76        |
| 8        | Lutein            | 568.5  | 8                | 476.36; 119.05; 105.01; 338.24 | 8; 34; 44; 10        |
| 9        | Canthaxanthin     | 565.53 | 14               | 133.02; 203.11; 105.00; 363.25 | 32; 12; 58; 6        |
| 10       | Echinenone        | 550.73 | 18               | 458.40 202.83 170.76 156.65    | 8; 14; 26; 30        |
| 11       | $\beta$ -Carotene | 536.8  | 16               | 444.45 104.52 118.58 90.38     | 10; 48; 40; 60       |

**Table S2.** Calibration curves of standards for the determination of carotenoid in microalgae.

| Compound | Name              | LOD (ppb) | LOQ (ppb) | Calibration ranges (ppb) | Calibration curves (ppb) | R <sup>2</sup> |
|----------|-------------------|-----------|-----------|--------------------------|--------------------------|----------------|
| 1        | Fucoxanthin       | 2.06      | 6.85      | LOQ-500                  | 58.3645x + 71.7837       | 0.9971         |
| 2        | Violaxanthin      | 1.19      | 3.96      | LOQ-625                  | 100.941x + 574.666       | 0.9984         |
| 3        | Neoxanthin        | 0.38      | 1.27      | LOQ-625                  | 314.358x + 1231.63       | 0.9964         |
| 4        | Astaxanthin       | 0.40      | 1.33      | LOQ-500                  | 301.726x - 291728        | 0.9751         |
| 5        | Antheraxanthin    | 0.51      | 1.70      | LOQ-625                  | 234.862x + 350.891       | 0.9962         |
| 6        | Meso-zeaxanthin   | 0.02      | 0.08      | LOQ-500                  | 4861.13x + 4495.87       | 0.9958         |
| 7        | Zeaxanthin        | 0.03      | 0.09      | LOQ-625                  | 4443.93x + 5109.34       | 0.9970         |
| 8        | Lutein            | 0.12      | 0.41      | LOQ-500                  | 964.214x + 658.069       | 0.9958         |
| 9        | Canthaxanthin     | 0.27      | 0.90      | LOQ-500                  | 443.201x - 150.188       | 0.9918         |
| 10       | Echinenone        | 0.08      | 0.27      | LOQ-625                  | 1467.21x + 2007.5        | 0.9938         |
| 11       | $\beta$ -Carotene | 0.02      | 0.08      | LOQ-535                  | 5254.84x + 2749.83       | 0.9976         |
